# Supplementary material for: ZnO@Ag2S core–shell nanowire arrays for environmentally friendly solid-state quantum dot-sensitized solar cells with panchromatic light capture and enhanced electron collection
Source: Royal Society of Chemistry journal article supplement (doi:10.1039/c4cp06068g), 2015-01-01
Supplement: c4cp06068g1.pdf [file c4cp06068g1.pdf]

Supporting information

**ZnO@Ag<sub>2</sub>S core-shell nanowire arrays for environmental friendly solid-state quantum dot-sensitized solar cell with panchromatic light capture and enhanced electron collection**

Xiaoliang Zhang,<sup>a</sup> Jianhua Liu,<sup>b</sup> Jindan Zhang,<sup>b</sup> Nick Vlachopoulos,<sup>a,c</sup> Erik M. J. Johansson<sup>\*a</sup>

<sup>a</sup> Department of Chemistry-Ångström Laboratory, Uppsala University, 75120 Uppsala, Sweden

<sup>b</sup> School of Materials Science and Engineering, Beihang University, 100191 Beijing, China

<sup>c</sup> Laboratory of Photomolecular Science, Institute of Chemical Sciences and Engineering, École Polytechnique Fédérale de Lausanne, EPFL-FSB-ISIC-LSPM, Station 6, CH-1015 Lausanne, Switzerland

\*Corresponding Author: erik.johansson@kemi.uu.se

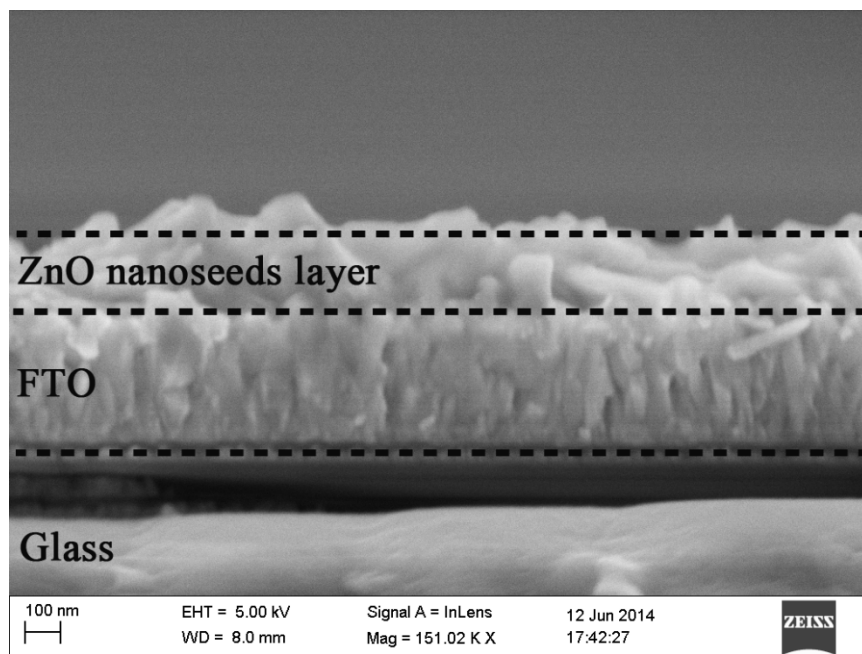

**Figure S1.** Cross-sectional SEM image of ZnO nano seeds layer covered FTO substrate. The layer thickness is around 100 nm.

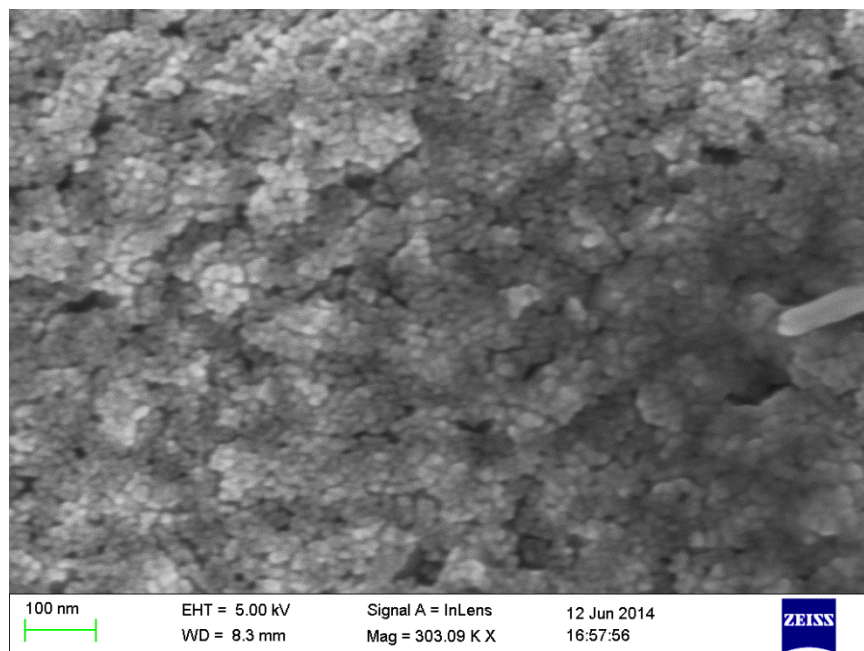

**Figure S2.** SEM image of top surface of ZnO NPs seeds covered FTO substrates.

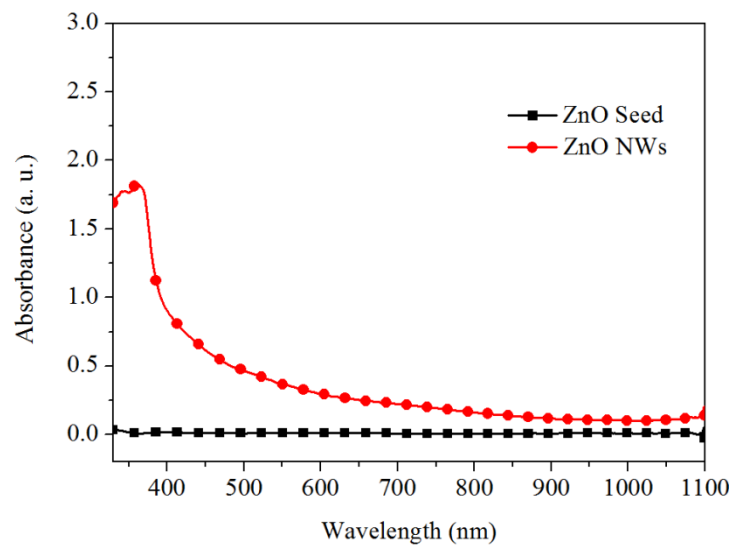

**Figure S3.** Light absorption spectra of ZnO NWAs film.

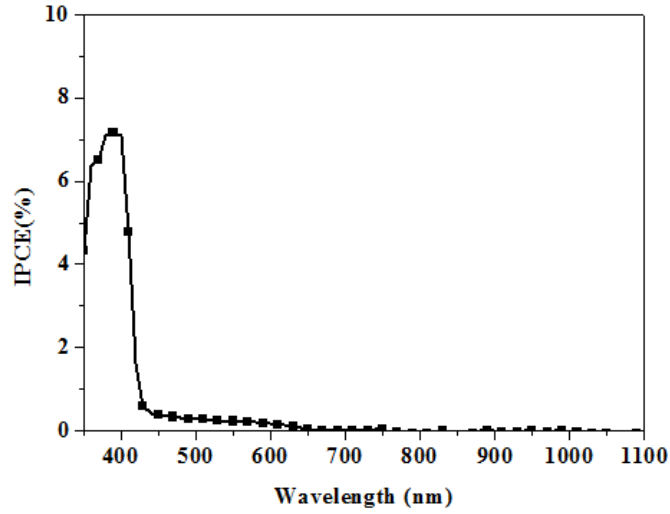

**Figure S4.** IPCE spectrum of the device without QDs than only contains NWAs and P3HT.

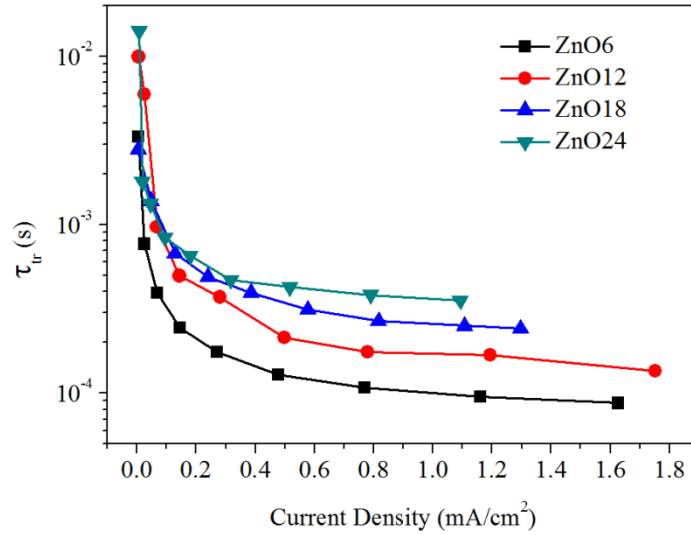

**Figure S5.** Electron transport time as function of short-circuit density for NWAs device with different NW length.

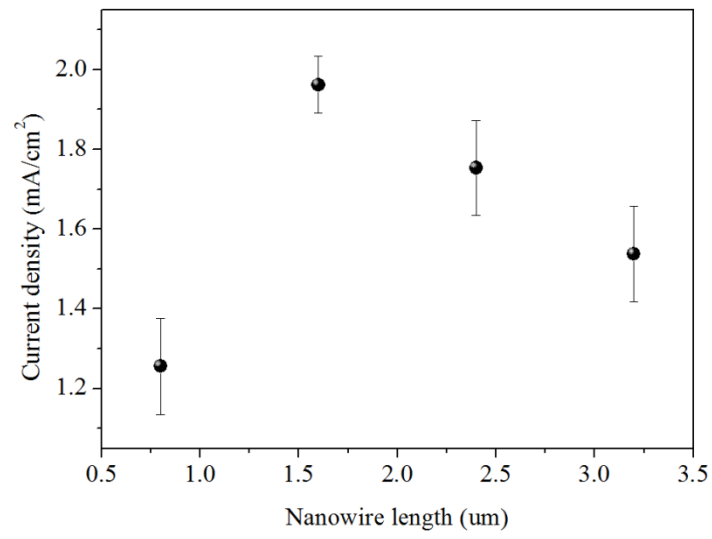

**Figure S6.** Photocurrent density as a function of NW length in core-shell NWAs photoanode.
